# Supplementary figures and images for: The crises of Israeli democracy: political-ideological framings by members of Israel’s 24th Knesset
Source: Frontiers journal article supplement (doi:10.3389/fpos.2025.1530752), 2025-02-26

**Special appendix D**

**Quoted sources**

**1**


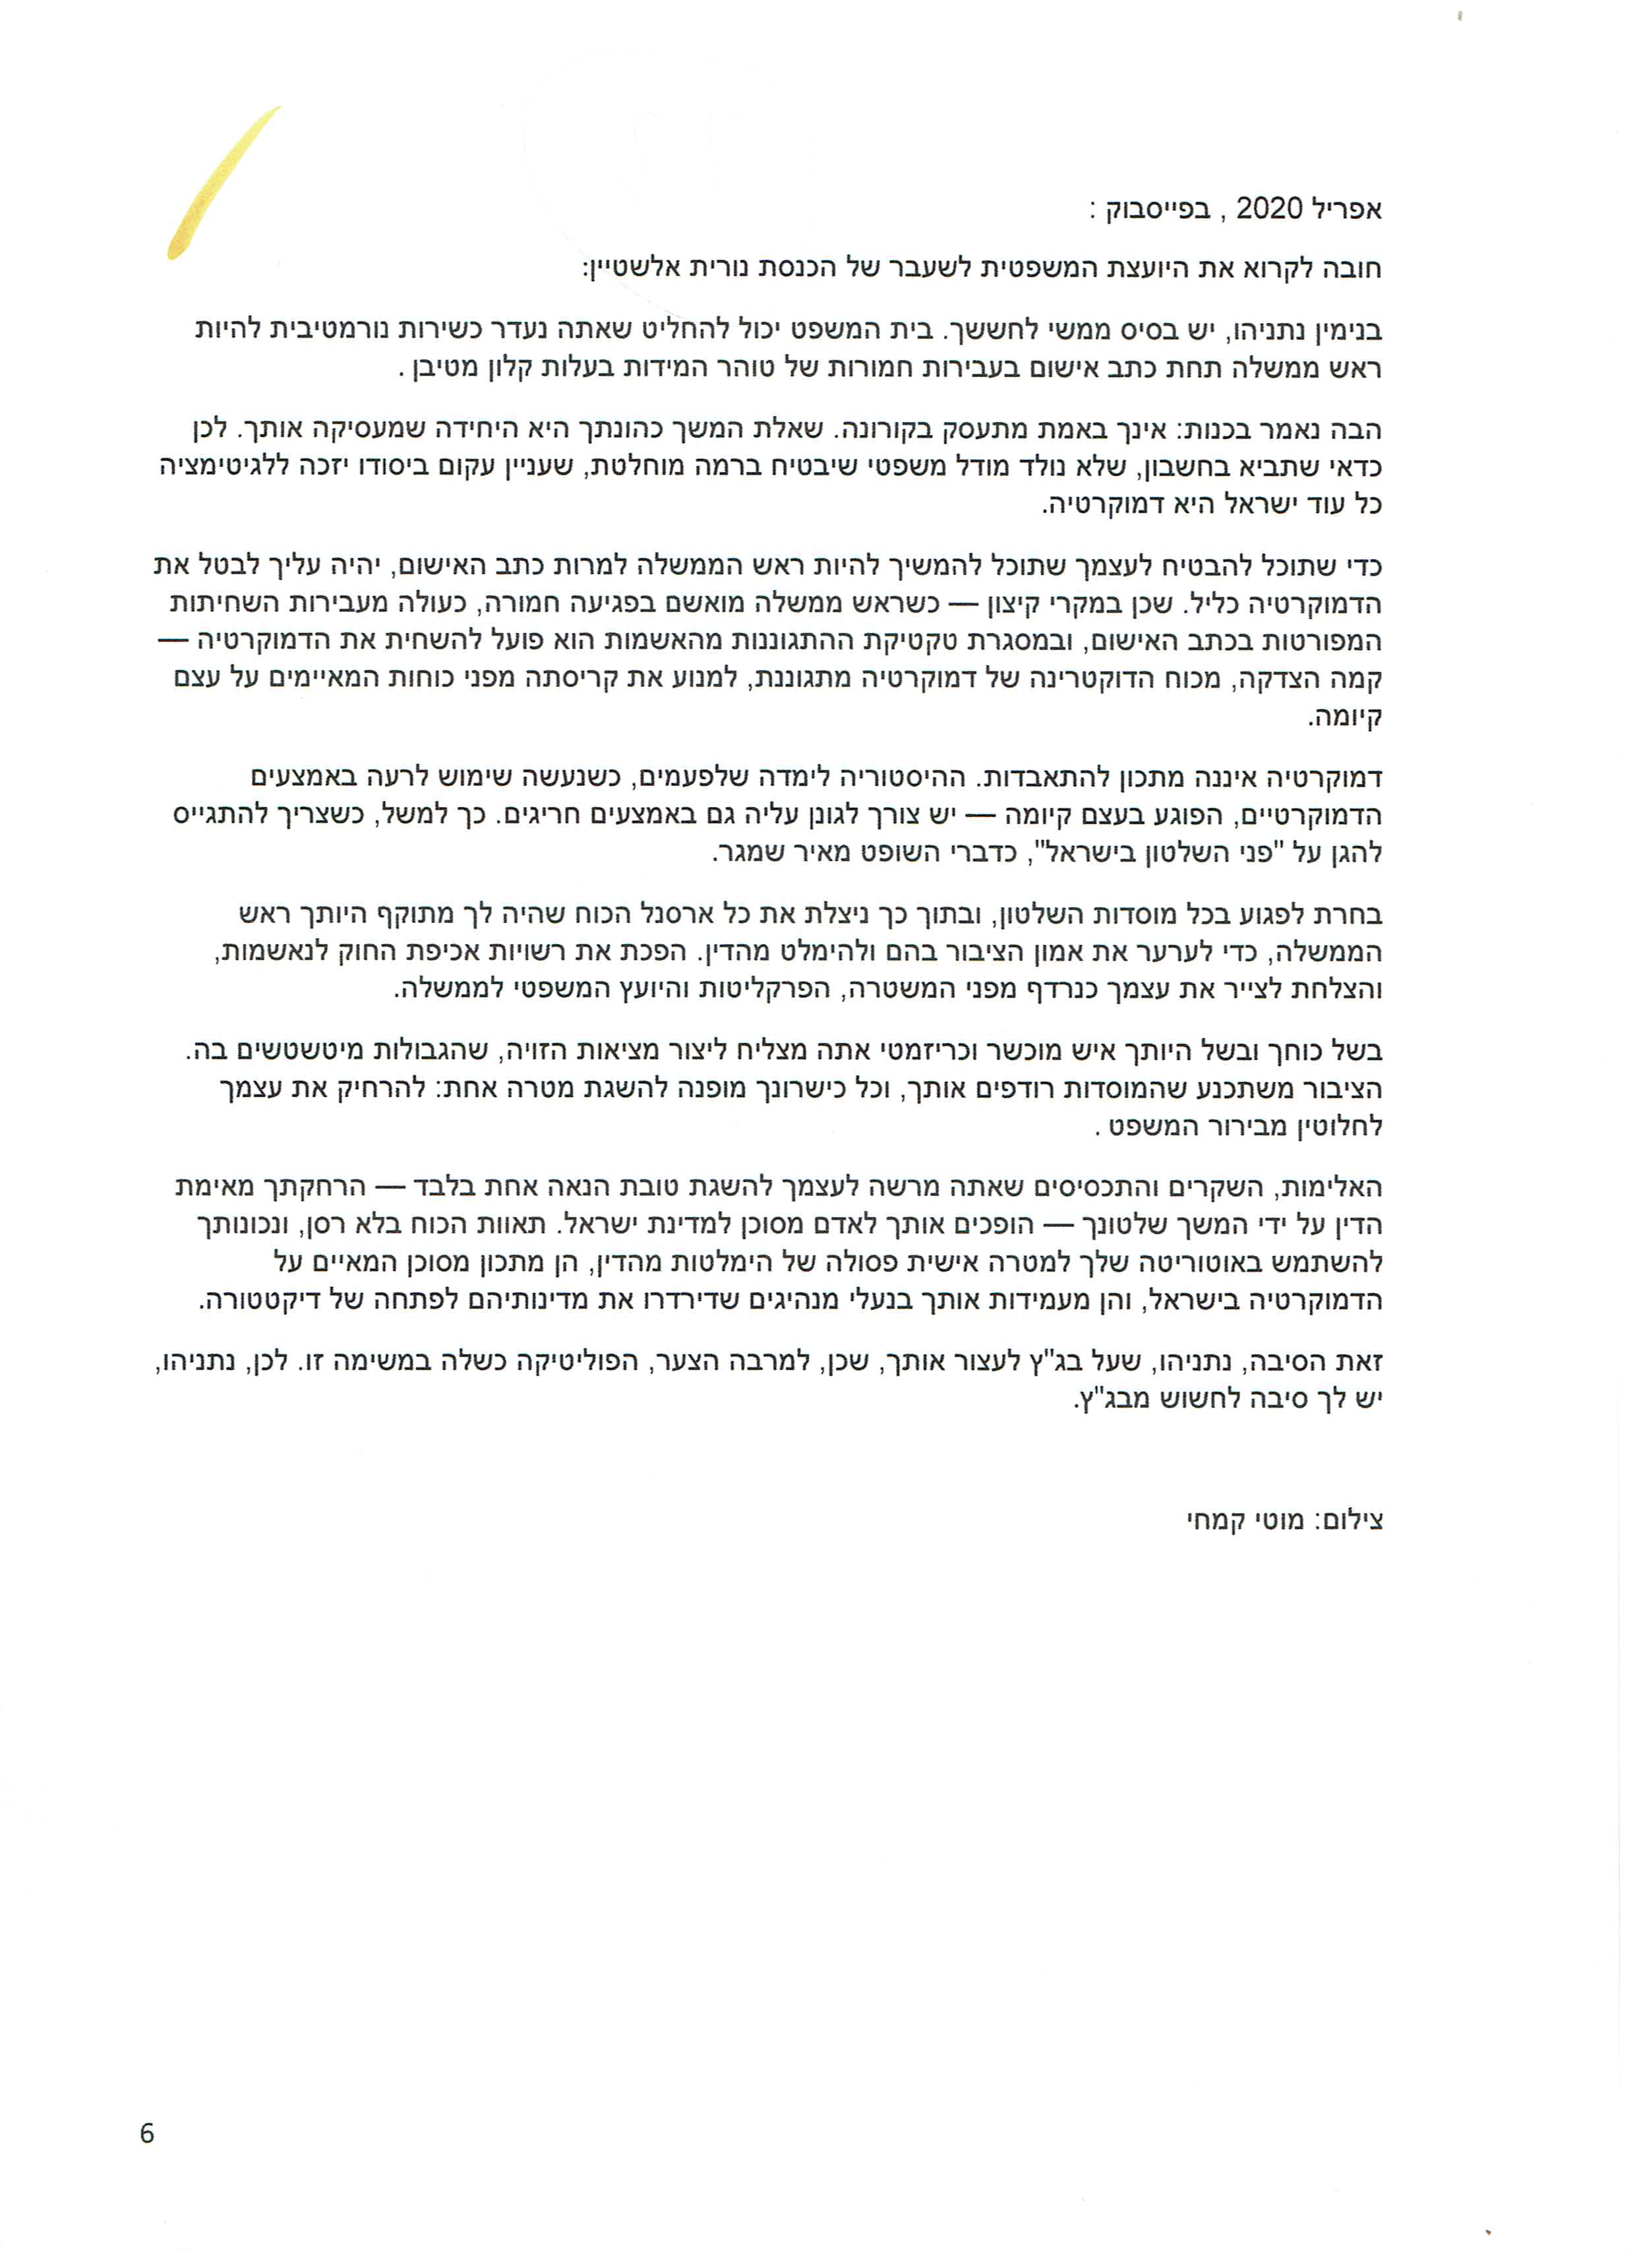


**2**


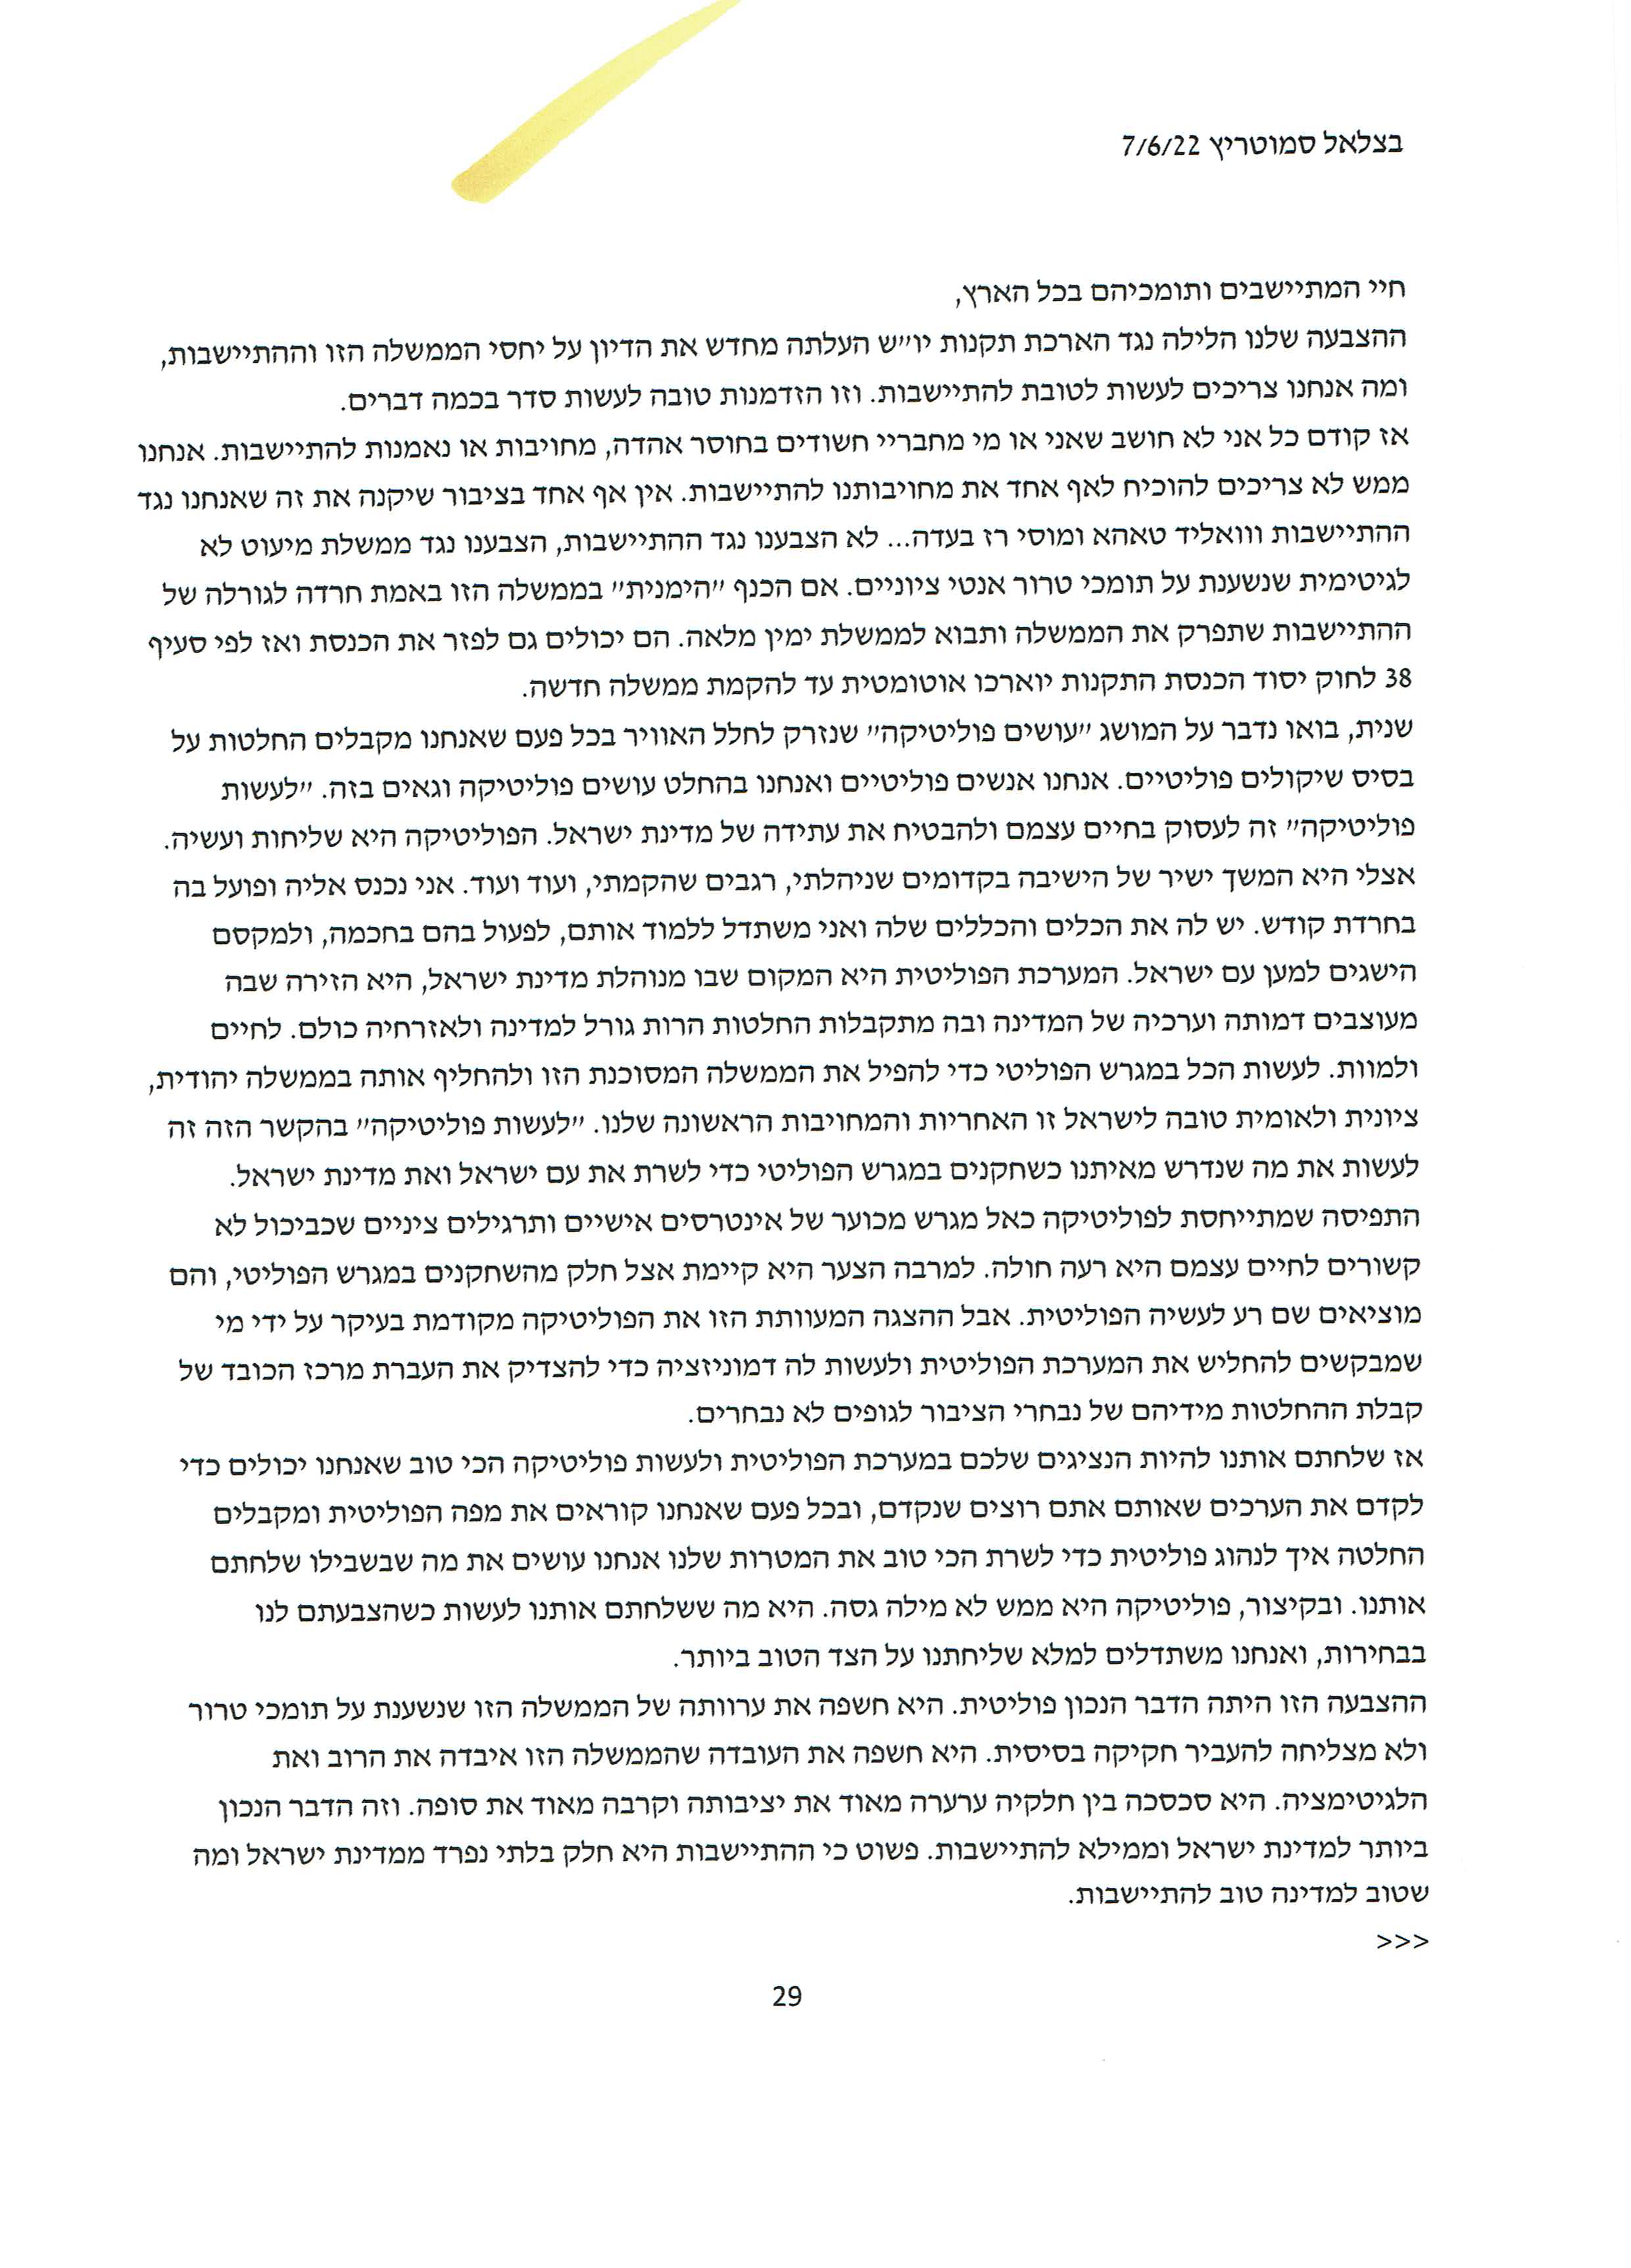


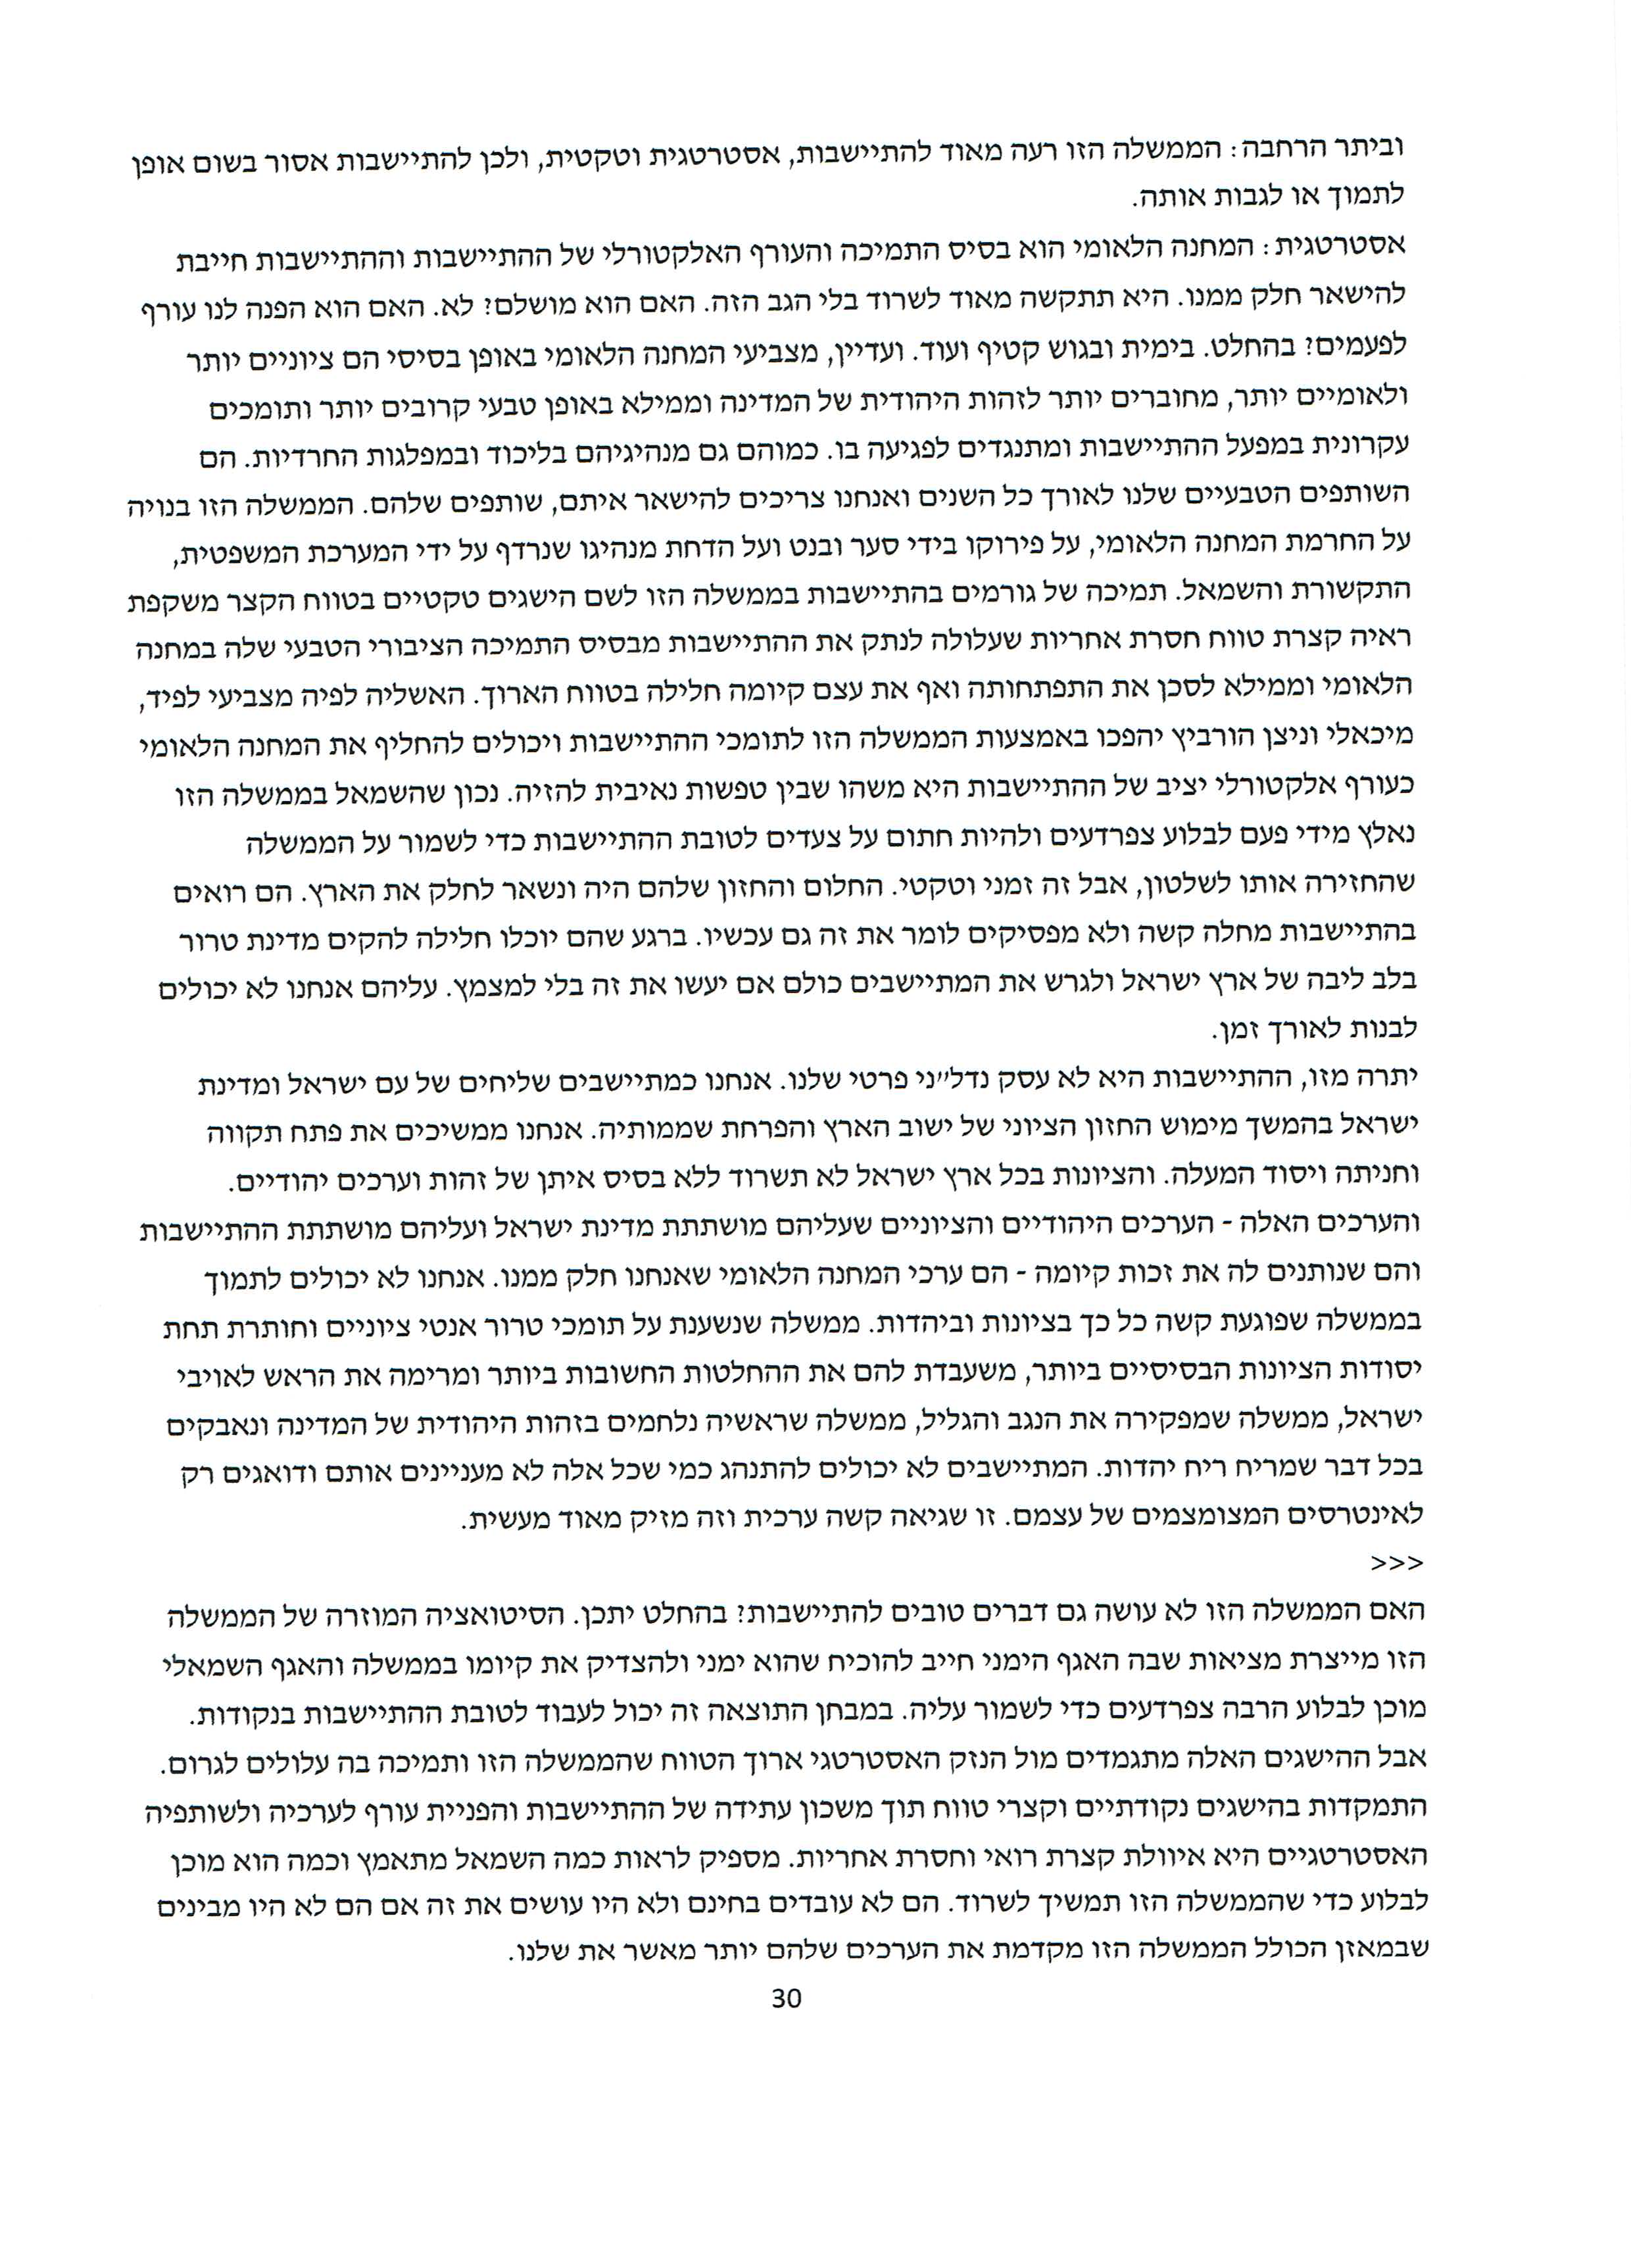


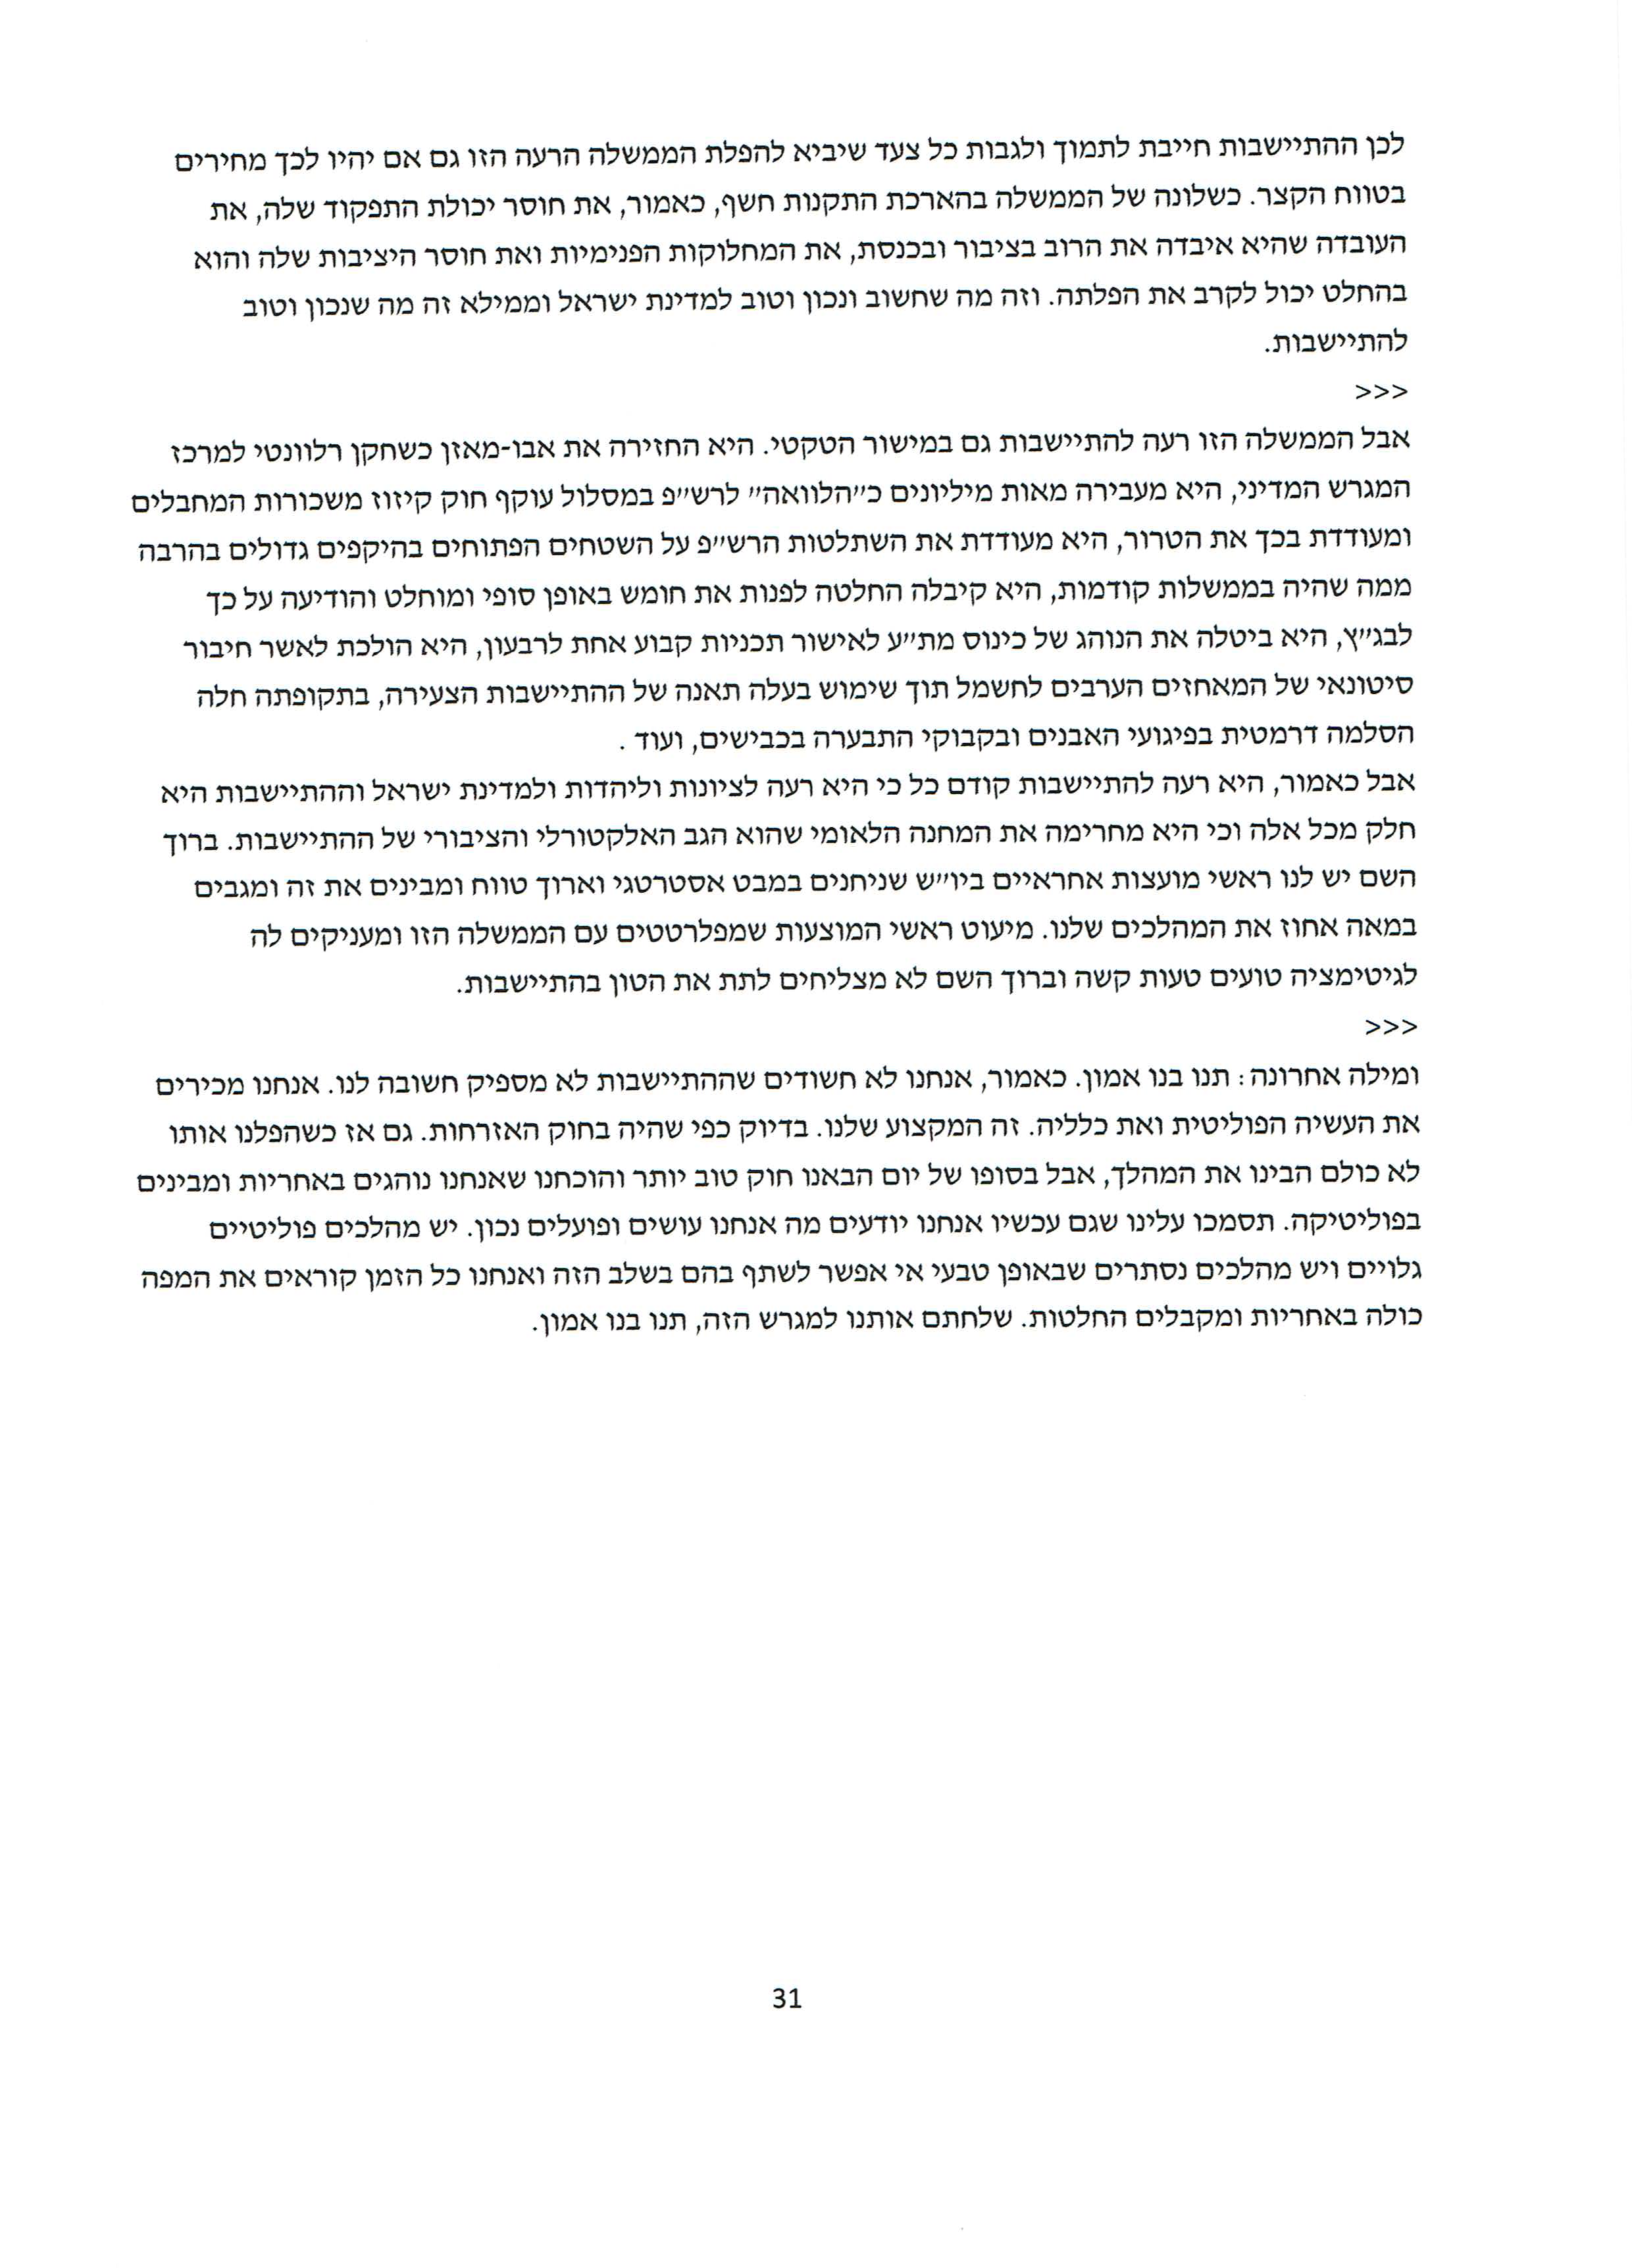


**3**


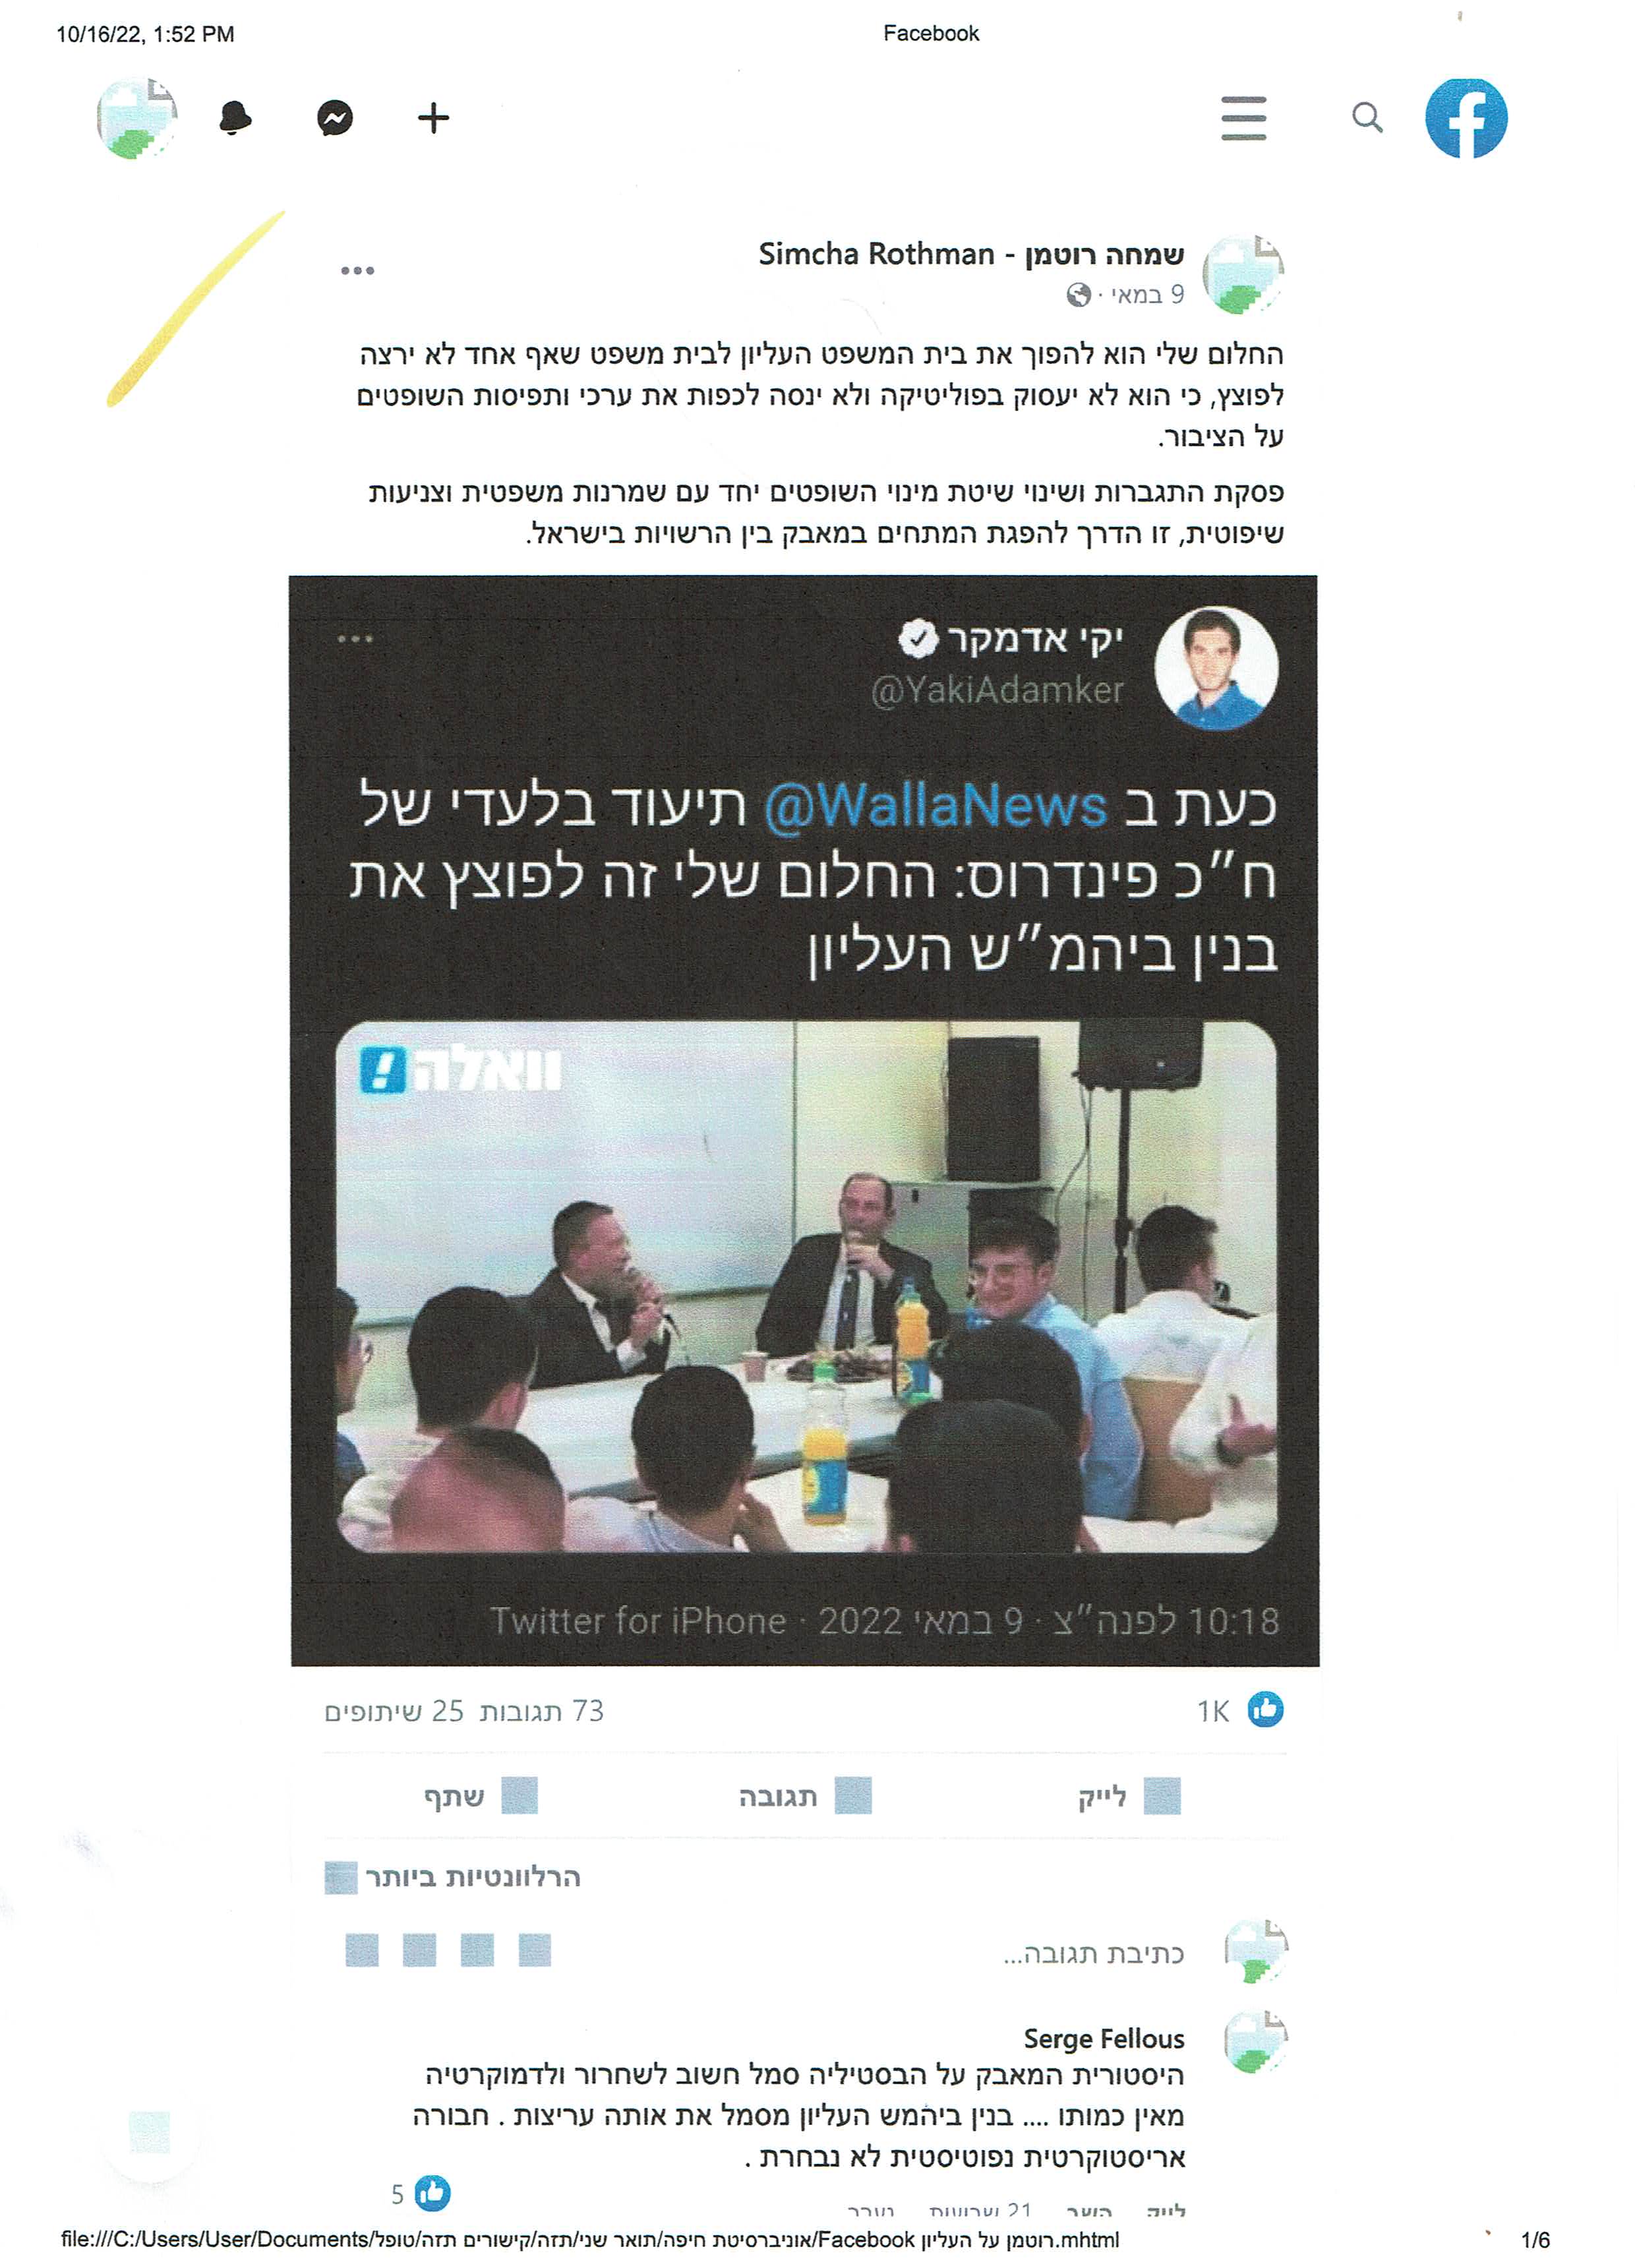


**4**


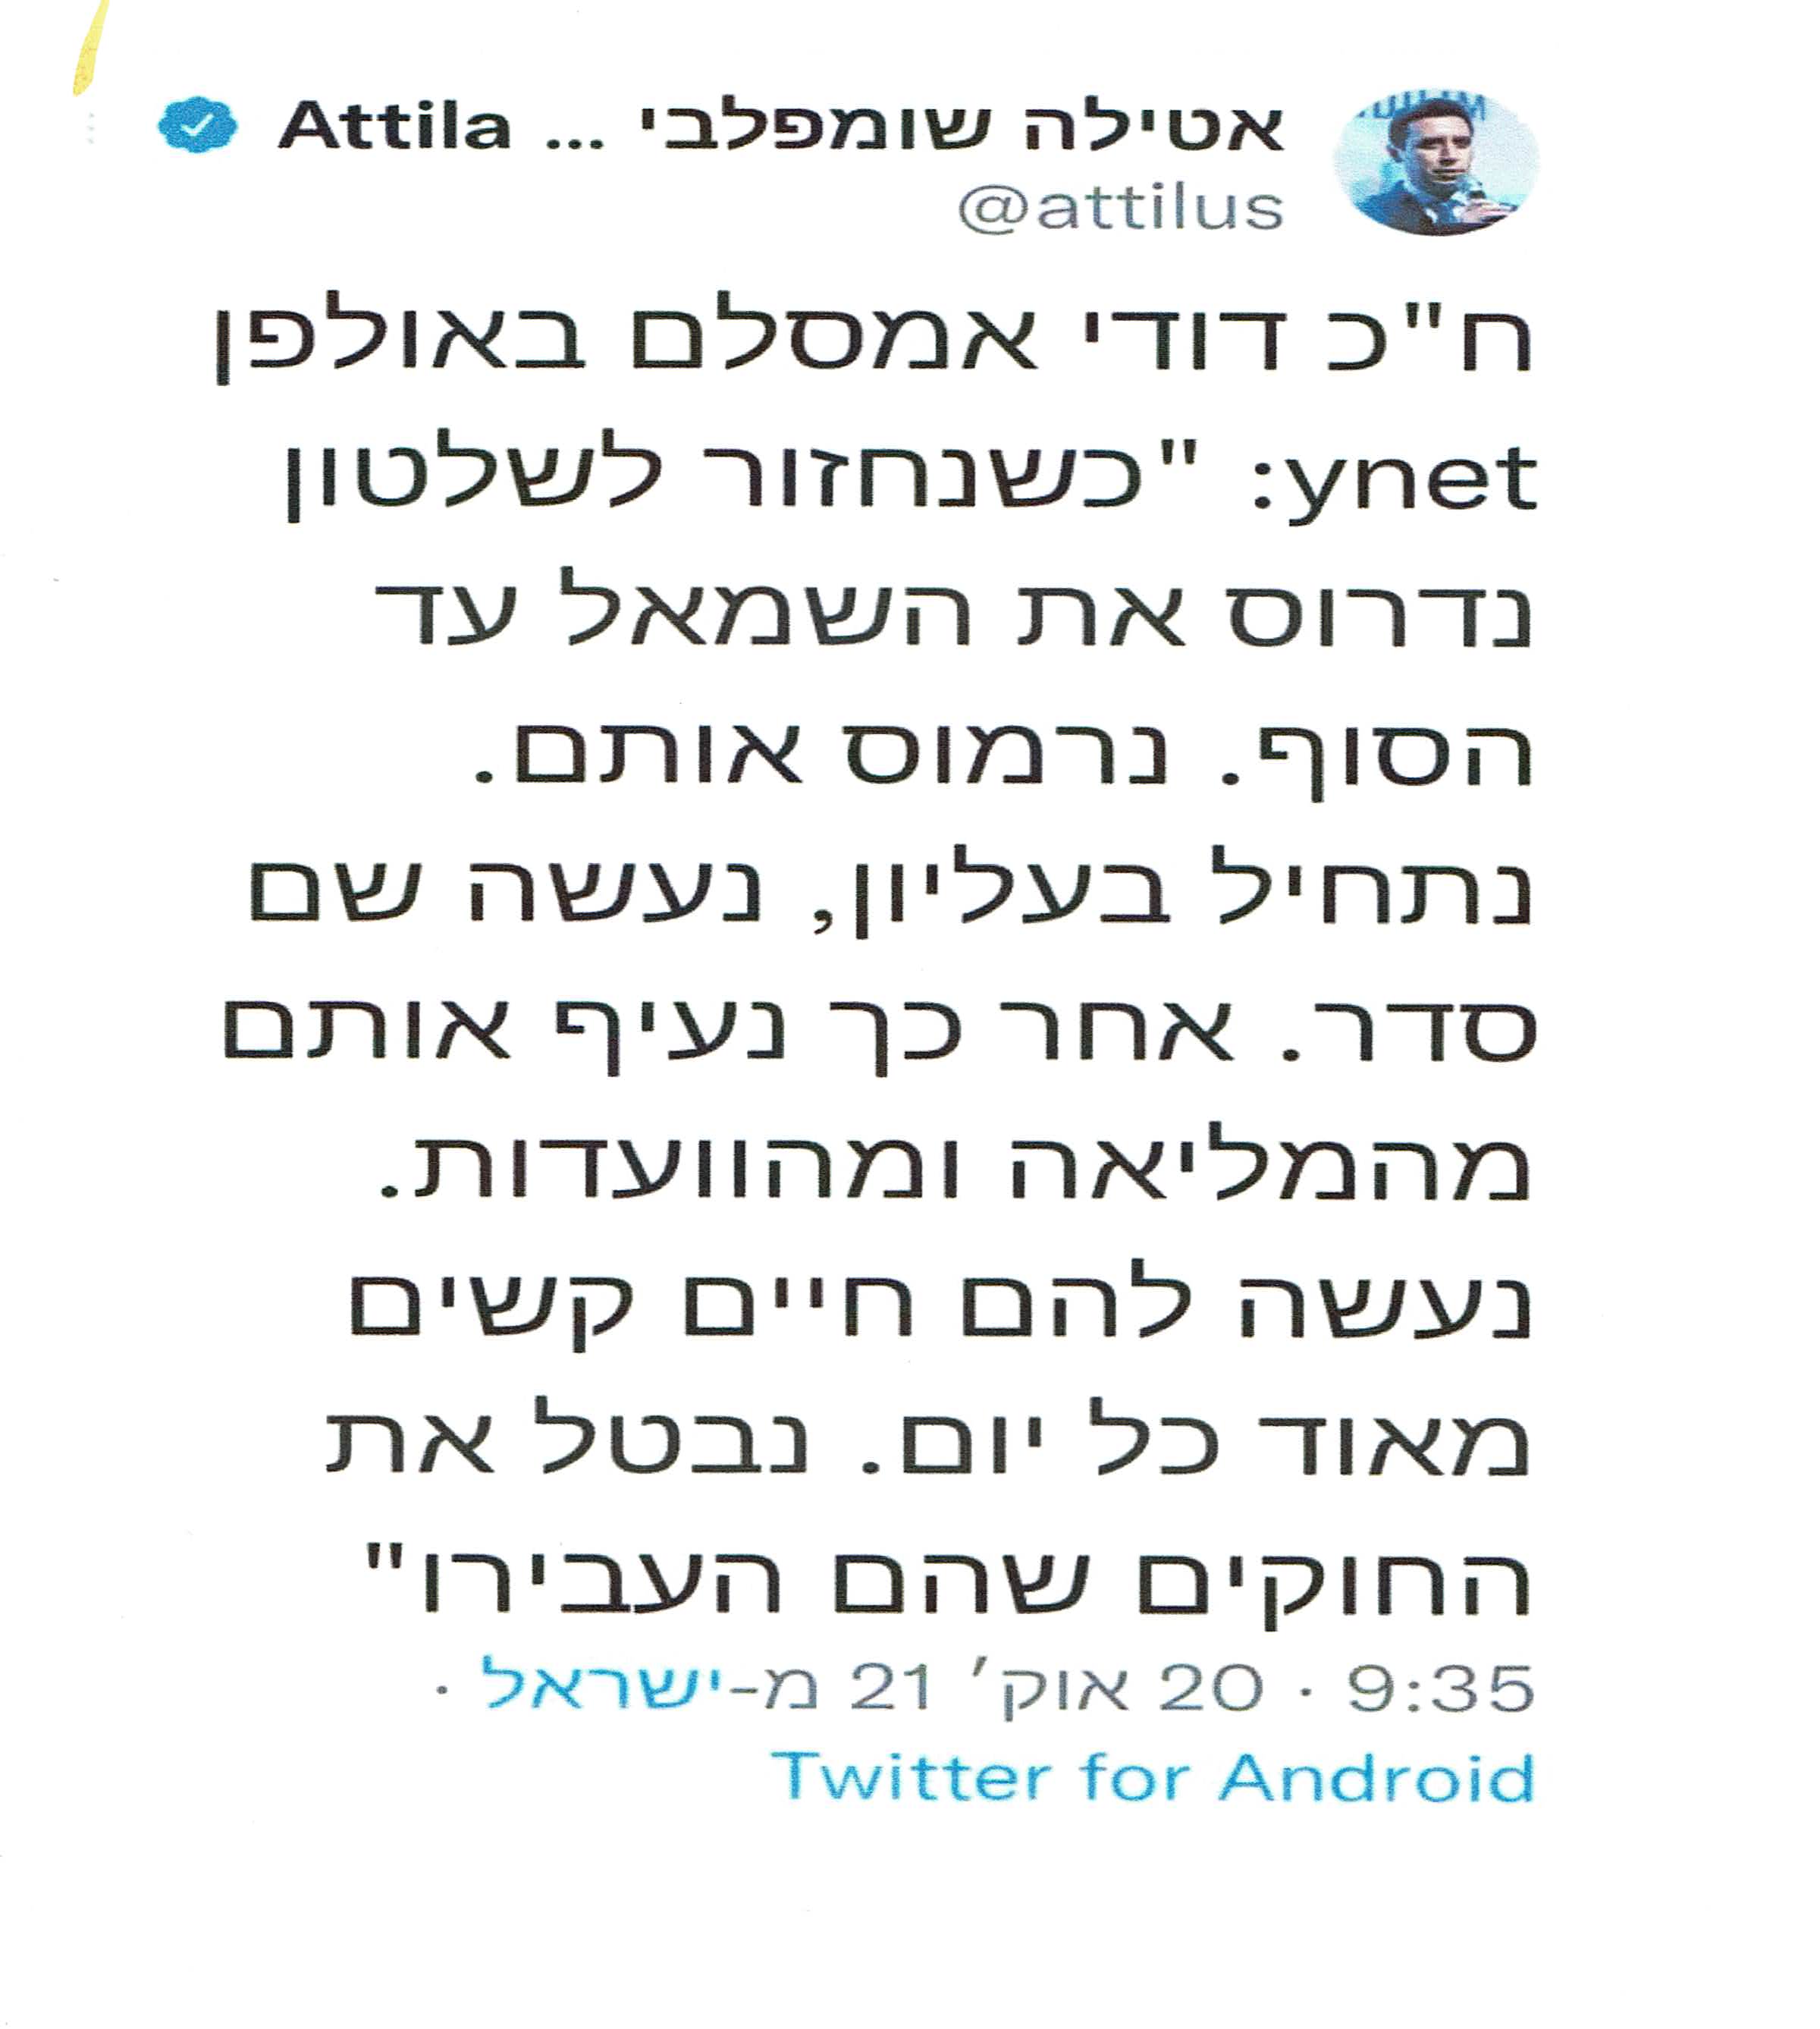


**5**


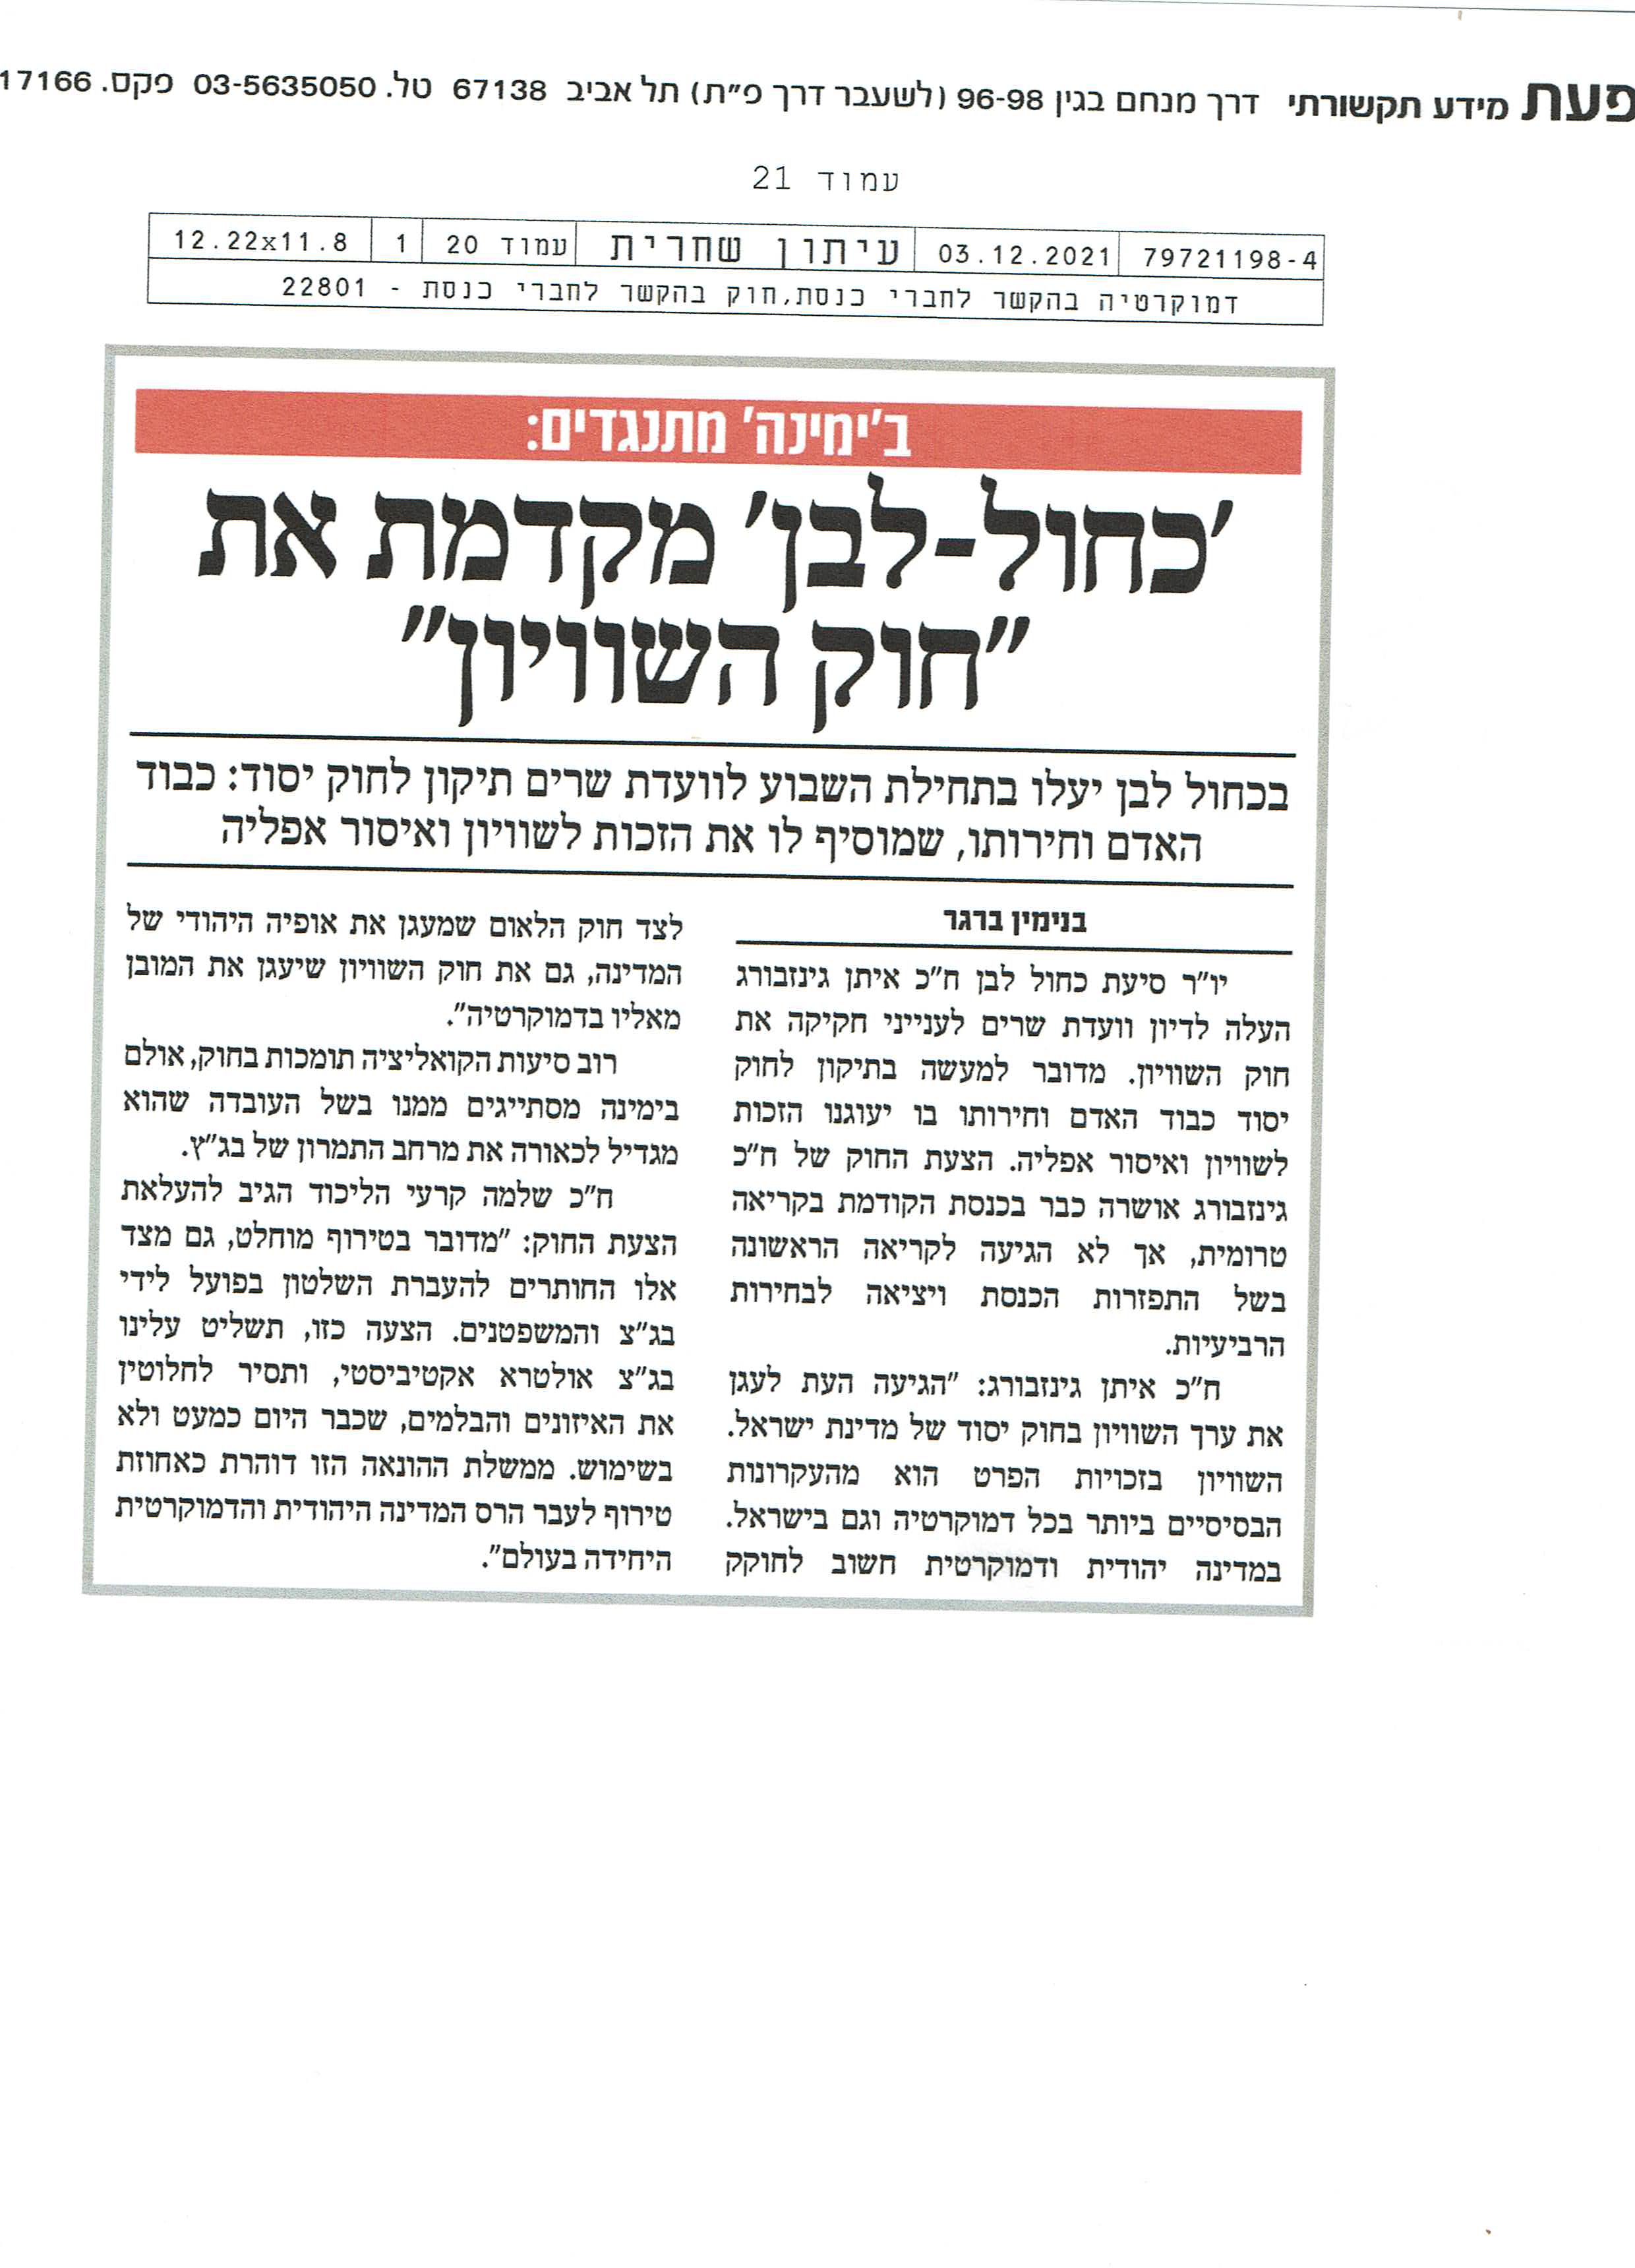

Supplement: Data_Sheet_2.docx [file Data_Sheet_2.docx]
